# Supplementary material for: Biodiversity and Ecosystem Multi-Functionality: Observed Relationships in Smallholder Fallows in Western Kenya
Source: PLOS journal article supplement (doi:10.1371/journal.pone.0050152), 2012-11-28
Supplement: S1 (10.1371/journal.pone.0050152.s001) [file journal.pone.0050152.s001]

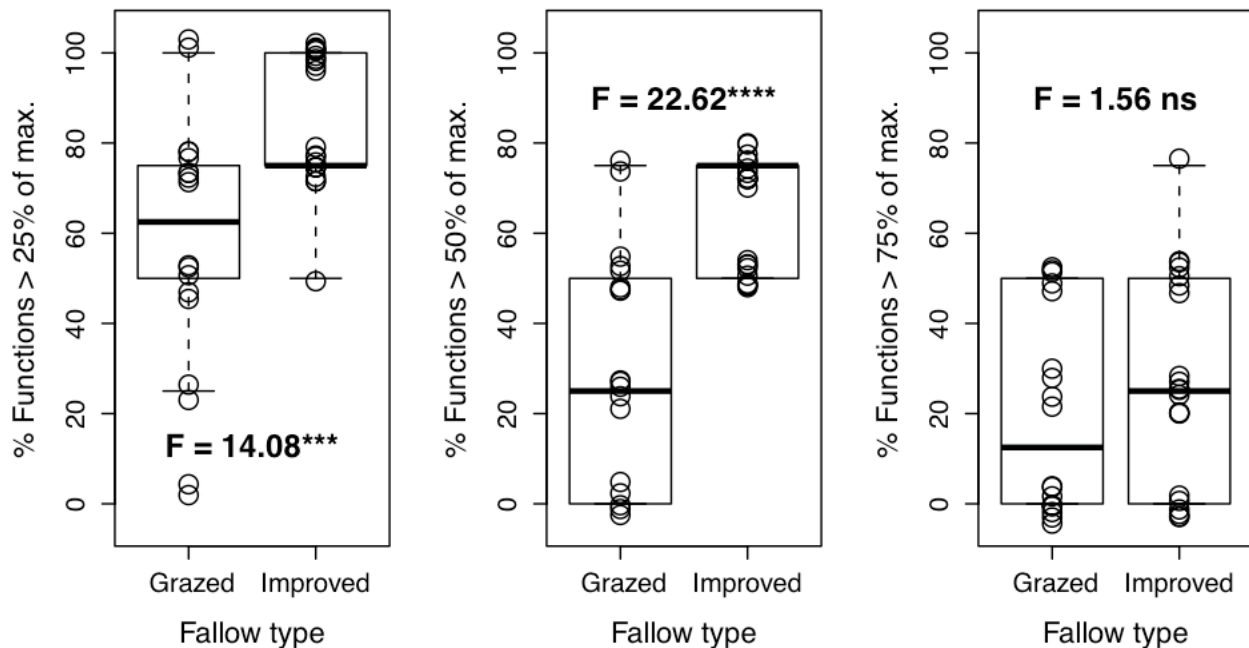

**Figure S1** Variation among fallow types in ecosystem multi-functionality in terms of the proportion of ecosystem functions above 25, 50, and 75% of respective function maxima; points are jittered slightly for greater clarity. Statistics presented from one-way ANOVA with d.f. = 1, 37. \* =  $P < 0.05$ , \*\* =  $P < 0.01$ , \*\*\* =  $P < 0.001$ , \*\*\*\* =  $P < 0.0001$ , ns =  $P > 0.1$ .
